# Supplementary material
Source: MDPI journal article supplement (https://www.mdpi.com/2311-7524/10/4/367)
Supplement: s1 [file s1]

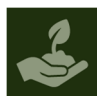

# Supplementary Materials for the Research Article Scrutinizing the Antimicrobial and Antioxidant Potency of European Cranberry Bush (*Viburnum opulus* L.) Extracts

Karina Juhnevica-Radenkova <sup>1</sup>, Inta Krasnova <sup>1</sup>, Daliya Seglina <sup>1</sup>, Sandra Muizniece-Brasava <sup>2</sup>, Anda Valdovska <sup>3</sup> and Vitalijs Radenkovs <sup>1,3,\*</sup>

<sup>1</sup> Institute of Horticulture (LatHort), LV-3701 Dobeles, Latvia; karina.juhnevica-radenkova@lbtu.lv (K.J.-R.); inta.krasnova@lbtu.lv (I.K.); daliya.seglina@lbtu.lv (D.S.)

<sup>2</sup> Food Institute, Faculty of Agriculture and Food Technology, Latvia University of Life Sciences and Technologies, LV-3004 Jelgava, Latvia; sandra.muizniece@lbtu.lv

<sup>3</sup> Research Laboratory of Biotechnology, Latvia University of Life Sciences and Technologies, LV-3004 Jelgava, Latvia; anda.valdovska@lbtu.lv

\* Correspondence: vitalijs.radenkovs@lbtu.lv

**Abstract:** In the process of considering the documented health benefits of *Viburnum opulus* L. (*V. opulus*), including its anti-inflammatory and antioxidant activities, the present study was designed to qualitatively and quantitatively evaluate the biochemical profile and antimicrobial potency of four commercially available *V. opulus* extracts. These extracts were obtained from its flowers, bark, berries, and a mixture thereof by cold ultrasound-assisted extraction. An examination of the *V. opulus* extracts indicated a relative abundance of group compounds, such as phenolics, flavonoids, tannins, and anthocyanins, which are responsible for antioxidant activity (AOA). The widest range in all of the four group compounds was detected in the *V. opulus* extract sourced from berries, whereas the narrowest range was found in those obtained from flowers. The HPLC-ESI-TQ-MS/MS technique displayed relative fluctuations in the concentrations of individual amino acids (AAs) over the four *V. opulus* extracts. The prevalence of proline was marked in the flower-derived extract, which made up 63.3% of the total AAs, while aspartic and glutamic acids dominated in the berry-derived extract by contributing up to 29.2 and 24.4% to the total AA content, respectively. Profiling of the individual phenolic compounds disclosed the superiority of chlorogenic acid (up to 90.3%) in the berry and mixed extracts, as well as catechin (up to 57.7%) and neochlorogenic acid (11.1%) in the bark extract, which conveyed a remarkable contribution toward antimicrobial activity. The lowest content of individual phenolics was found in the flower extract. Owing to its substantially denser bioactive composition, the *V. opulus* berries and bark extracts exhibited markedly better AOA, which was pinpointed by three independent methods, i.e., DPPH•, FRAP, and ABTS••, than those obtained from flowers or a mixture of *V. opulus* morphological parts. As part of the antimicrobial activity testing, the *V. opulus* extracts exhibited outstanding inhibitory activity and a homeopathic mode of action. The *V. opulus* extracts obtained from a mixture, bark, and berries were more active against 8 out of 19 selected test microorganisms at minimum inhibitory concentration (MIC) values that ranged from 0.24 to 0.49 µL mL<sup>-1</sup>. Overall, the extracts of *V. opulus* were found to be effective against Gram-positive and Gram-negative bacteria. However, their conceivable exploitation as functional or pharmaceutical ingredients must be further clarified within in vivo models.

**Keywords:** antibacterial activity; catechins; chlorogenic acid; cramp bark bioactives; minimum inhibitory concentration; resistance

**Citation:** Juhnevica-Radenkova, K.; Krasnova, I.; Seglina, D.; Muizniece-Brasava, S.; Valdovska, A.; Radenkovs, V. Scrutinizing the Antimicrobial and Antioxidant Potency of European Cranberry Bush (*Viburnum opulus* L.) Extracts. *Horticulturae* **2024**, *10*, x. <https://doi.org/10.3390/xxxxx>

Academic Editor(s): Michailidis Michail

Received: 11 March 2024

Revised: 2 April 2024

Accepted: 3 April 2024

Published: date

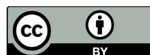

**Copyright:** © 2024 by the authors. Submitted for possible open access publication under the terms and conditions of the Creative Commons Attribution (CC BY) license (<https://creativecommons.org/licenses/by/4.0/>).

**Table S1.** Calibration data and linearity for group compounds and antioxidant activity tests.

| Compound | Linearity range, $\mu\text{g mL}^{-1}$ | Calibration curve means (intercept (a) and slope (b)) | Coefficient of determination ( $R^2$ ) |
|----------|----------------------------------------|-------------------------------------------------------|----------------------------------------|
| TPC      | 10–100                                 | $y = 6.8 \times 10^{-3} - 4.4 \times 10^{-3}$         | 0.9994                                 |
| TFC      | 50–300                                 | $y = 3.5 \times 10^{-3} - 9.5 \times 10^{-3}$         | 0.9993                                 |
| TTC      | 5–100                                  | $y = 1.52 \times 10^{-2} - 7.8 \times 10^{-3}$        | 0.9994                                 |
| DPPH•    | 10–200                                 | $y = 5.78 \times 10^{-1} + 1.1584$                    | 0.9991                                 |
| FRAP     | 10–100                                 | $Y = 8.8 \times 10^{-3} + 7.9 \times 10^{-3}$         | 0.9982                                 |
| ABTS•+   | 25–200                                 | $y = 2.9 \times 10^{-3} - 2.2 \times 10^{-2}$         | 0.9952                                 |

*Note:* TPC – total phenolics content; TFC – total flavonoids content; TTC – total tannins content; TAC – total anthocyanins content.

**Table S2.** Multiple reaction monitoring (MRM) transitions, collision energy, Q1, Q3 and dwell time for investigated amino acids.

| Compound      | Retention time,<br>min | Molecular<br>formula                                                        | Ionization<br>mode | MRM transitions   | Q1 Pre Bias,<br>V | Collision energy,<br>V | Q3 Pre Bias,<br>V | Dwell time, msec |
|---------------|------------------------|-----------------------------------------------------------------------------|--------------------|-------------------|-------------------|------------------------|-------------------|------------------|
| Cystine       | 1.959                  | C <sub>6</sub> H <sub>12</sub> N <sub>2</sub> O <sub>4</sub> S <sub>2</sub> | [M+H] <sup>+</sup> | 240.8000→74.1000  | -15.0             | -28.0                  | -16.0             | 16.0             |
|               |                        |                                                                             |                    | 240.8000→152.1500 | -29.0             | -13.0                  | -12.0             | 16.0             |
| Aspartic acid | 1.997                  | C <sub>4</sub> H <sub>7</sub> NO <sub>4</sub>                               | [M+H] <sup>+</sup> | 134.1000→73.9500  | -15.0             | -15.0                  | -16.0             | 16.0             |
|               |                        |                                                                             |                    | 134.1000→88.1000  | -20.0             | -12.0                  | -25.0             | 16.0             |
| Serine        | 2.046                  | C <sub>3</sub> H <sub>7</sub> NO <sub>3</sub>                               | [M+H] <sup>+</sup> | 106.2000→60.1000  | -12.0             | -11.0                  | -26.0             | 16.0             |
|               |                        |                                                                             |                    | 106.2000→42.2000  | -20.0             | -23.0                  | -17.0             | 16.0             |
| Threonine     | 2.128                  | C <sub>4</sub> H <sub>9</sub> NO <sub>3</sub>                               | [M+H] <sup>+</sup> | 119.9000→74.2000  | -18.0             | -11.0                  | -16.0             | 16.0             |
|               |                        |                                                                             |                    | 119.9000→56.2000  | -19.0             | -15.0                  | -12.0             | 16.0             |
| Glycine       | 2.135                  | C <sub>2</sub> H <sub>5</sub> NO <sub>2</sub>                               | [M+H] <sup>+</sup> | 76.2000→30.2000   | -12.0             | -11.0                  | -13.0             | 16.0             |
|               |                        |                                                                             |                    | 76.2000→31.2000   | -15.0             | -31.0                  | -13.0             | 16.0             |
| Glutamic acid | 2.165                  | C <sub>5</sub> H <sub>9</sub> NO <sub>4</sub>                               | [M+H] <sup>+</sup> | 148.0500→84.1500  | -16.0             | -17.0                  | -18.0             | 16.0             |
|               |                        |                                                                             |                    | 148.0500→56.1500  | -16.0             | -26.0                  | -25.0             | 16.0             |
| Alanine       | 2.254                  | C <sub>3</sub> H <sub>7</sub> NO <sub>2</sub>                               | [M+H] <sup>+</sup> | 89.9000→44.2000   | -10.0             | -12.0                  | -19.0             | 16.0             |
|               |                        |                                                                             |                    | 89.9000→45.1500   | -10.0             | -31.0                  | -19.0             | 16.0             |
| Proline       | 2.262                  | C <sub>5</sub> H <sub>9</sub> NO <sub>2</sub>                               | [M+H] <sup>+</sup> | 116.2500→70.2000  | -13.0             | -16.0                  | -15.0             | 16.0             |
|               |                        |                                                                             |                    | 116.2500→43.2000  | -13.0             | -31.0                  | -18.0             | 16.0             |
| Histidine     | 2.870                  | C <sub>6</sub> H <sub>9</sub> N <sub>3</sub> O <sub>2</sub>                 | [M+H] <sup>+</sup> | 156.2500→110.1000 | -10.0             | -15.0                  | -23.0             | 16.0             |
|               |                        |                                                                             |                    | 156.2500→83.2000  | -10.0             | -24.0                  | -18.0             | 16.0             |
| Lysine        | 3.027                  | C <sub>6</sub> H <sub>14</sub> N <sub>2</sub> O <sub>2</sub>                | [M+H] <sup>+</sup> | 146.9000→84.2000  | -17.0             | -18.0                  | -18.0             | 16.0             |
|               |                        |                                                                             |                    | 146.9000→130.1000 | -17.0             | -14.0                  | -27.0             | 16.0             |
| Arginine      | 3.183                  | C <sub>6</sub> H <sub>14</sub> N <sub>4</sub> O <sub>2</sub>                | [M+H] <sup>+</sup> | 175.1000→70.2000  | -19.0             | -22.0                  | -14.0             | 16.0             |
|               |                        |                                                                             |                    | 175.1000→116.1000 | -20.0             | -15.0                  | -26.0             | 16.0             |
| Valine        | 3.206                  | C <sub>5</sub> H <sub>11</sub> NO <sub>2</sub>                              | [M+H] <sup>+</sup> | 118.1000→72.1500  | -12.0             | -13.0                  | -15.0             | 39.0             |
|               |                        |                                                                             |                    | 118.1000→55.0500  | -13.0             | -23.0                  | -24.0             | 39.0             |
| Methionine    | 3.492                  | C <sub>5</sub> H <sub>11</sub> NO <sub>2</sub> S                            | [M+H] <sup>+</sup> | 150.1000→56.0000  | -16.0             | -17.0                  | -23.0             | 50.0             |
|               |                        |                                                                             |                    | 150.1000→104.1000 | -16.0             | -14.0                  | -12.0             | 50.0             |
| Tyrosine      | 4.576                  | C <sub>9</sub> H <sub>11</sub> NO <sub>3</sub>                              | [M+H] <sup>+</sup> | 182.1000→91.1500  | -20.0             | -28.0                  | -19.0             | 75.0             |
|               |                        |                                                                             |                    | 182.1000→136.1000 | -11.0             | -15.0                  | -15.0             | 75.0             |

Contin.

| Compound      | Retention time, min | Molecular formula                              | Ionization mode    | MRM transitions   | Q1 Pre Bias, V | Collision energy, V | Q3 Pre Bias, V | Dwell time, msec |
|---------------|---------------------|------------------------------------------------|--------------------|-------------------|----------------|---------------------|----------------|------------------|
| Leucine       | 5.521               | C <sub>6</sub> H <sub>13</sub> NO <sub>2</sub> | [M+H] <sup>+</sup> | 132.1000→86.1500  | -14.0          | -12.0               | -19.0          | 68.0             |
|               |                     |                                                |                    | 132.1000→44.1000  | -14.0          | -23.0               | -18.0          | 68.0             |
| Isoleucine    | 5.523               | C <sub>6</sub> H <sub>13</sub> NO <sub>2</sub> | [M+H] <sup>+</sup> | 132.1000→86.1500  | -14.0          | -11.0               | -19.0          | 68.0             |
|               |                     |                                                |                    | 132.1000→69.2500  | -21.0          | -18.0               | -15.0          | 68.0             |
| Phenylalanine | 8.827               | C <sub>9</sub> H <sub>11</sub> NO <sub>2</sub> | [M+H] <sup>+</sup> | 165.9000→120.1000 | -21.0          | -14.0               | -14.0          | 104.0            |
|               |                     |                                                |                    | 165.9000→103.1000 | -23.0          | -26.0               | -22.0          | 104.0            |

**Table S3.** Multiple reaction monitoring (MRM) transitions, collision energy, Q1, Q3 and dwell time for investigated phenolic compounds.

| Compound                   | Retention time, min | Molecular formula                               | Ionization mode    | MRM transitions   | Q1 Pre Bias, V | Collision energy, V | Q3 Pre Bias, V | Dwell time, msec |
|----------------------------|---------------------|-------------------------------------------------|--------------------|-------------------|----------------|---------------------|----------------|------------------|
| Gallic acid                | 8.430               | C <sub>7</sub> H <sub>6</sub> O <sub>5</sub>    | [M-H] <sup>-</sup> | 169.0000→124.9000 | 12.0           | 17.0                | 10.0           | 97.0             |
|                            |                     |                                                 |                    | 169.0000→78.9500  | 12.0           | 24.0                | 15.0           | 97.0             |
| Neochlorogenic acid        | 9.736               | C <sub>16</sub> H <sub>18</sub> O <sub>9</sub>  | [M-H] <sup>-</sup> | 353.1000→191.0500 | 13.0           | 22.0                | 20.0           | 63.0             |
|                            |                     |                                                 |                    | 353.1000→135.0000 | 13.0           | 31.0                | 12.0           | 63.0             |
| Protocatechuic acid        | 11.074              | C <sub>7</sub> H <sub>6</sub> O <sub>4</sub>    | [M-H] <sup>-</sup> | 153.2000→108.9500 | 10.0           | 16.0                | 20.0           | 21.0             |
|                            |                     |                                                 |                    | 153.2000→107.9500 | 10.0           | 24.0                | 22.0           | 21.0             |
| Chlorogenic acid           | 11.828              | C <sub>16</sub> H <sub>18</sub> O <sub>9</sub>  | [M-H] <sup>-</sup> | 353.1000→191.1000 | 19.0           | 22.0                | 20.0           | 18.0             |
|                            |                     |                                                 |                    | 353.1000→85.0500  | 13.0           | 43.0                | 16.0           | 18.0             |
| (+) -Catechin              | 12.180              | C <sub>15</sub> H <sub>14</sub> O <sub>6</sub>  | [M-H] <sup>-</sup> | 288.9500→245.0000 | 14.0           | 15.0                | 14.0           | 14.0             |
|                            |                     |                                                 |                    | 288.9500→109.0000 | 14.0           | 26.0                | 19.0           | 14.0             |
| (−)-Epicatechin            | 12.654              | C <sub>15</sub> H <sub>14</sub> O <sub>6</sub>  | [M-H] <sup>-</sup> | 289.0500→245.0000 | 14.0           | 16.0                | 14.0           | 14.0             |
|                            |                     |                                                 |                    | 289.0500→109.0000 | 14.0           | 26.0                | 20.0           | 14.0             |
| Vanillin                   | 12.974              | C <sub>8</sub> H <sub>8</sub> O <sub>3</sub>    | [M+H] <sup>+</sup> | 152.9500→65.1000  | -10.0          | -24.0               | -24.0          | 14.0             |
|                            |                     |                                                 |                    | 152.9500→93.0500  | -10.0          | -16.0               | -20.0          | 14.0             |
| Caffeic Acid               | 13.442              | C <sub>9</sub> H <sub>8</sub> O <sub>4</sub>    | [M-H] <sup>-</sup> | 179.1500→135.0000 | 12.0           | 18.0                | 25.0           | 23.0             |
|                            |                     |                                                 |                    | 179.1500→134.0000 | 12.0           | 25.0                | 24.0           | 23.0             |
| Rutin                      | 14.470              | C <sub>27</sub> H <sub>30</sub> O <sub>16</sub> | [M-H] <sup>-</sup> | 609.1000→300.0000 | 20.0           | 28.0                | 17.0           | 23.0             |
|                            |                     |                                                 |                    | 609.1000→301.0500 | 21.0           | 36.0                | 17.0           | 23.0             |
| <i>para</i> -Coumaric acid | 14.579              | C <sub>9</sub> H <sub>8</sub> O <sub>3</sub>    | [M-H] <sup>-</sup> | 163.0500→119.0500 | 11.0           | 16.0                | 21.0           | 23.0             |
|                            |                     |                                                 |                    | 163.0500→93.0500  | 12.0           | 31.0                | 17.0           | 23.0             |
| Luteolin-7-O-glucoside     | 14.717              | C <sub>21</sub> H <sub>20</sub> O <sub>11</sub> | [M-H] <sup>-</sup> | 447.0500→285.0500 | 20.0           | 28.0                | 17.0           | 23.0             |
|                            |                     |                                                 |                    | 447.0500→284.0000 | 21.0           | 36.0                | 17.0           | 23.0             |
| Vanillic acid              | 15.187              | C <sub>8</sub> H <sub>8</sub> O <sub>4</sub>    | [M-H] <sup>-</sup> | 167.1500→151.9500 | 18.0           | 17.0                | 27.0           | 23.0             |
|                            |                     |                                                 |                    | 167.1500→107.8000 | 11.0           | 17.0                | 17.0           | 23.0             |
| Sinapic acid               | 17.448              | C <sub>11</sub> H <sub>12</sub> O <sub>5</sub>  | [M-H] <sup>-</sup> | 223.3000→208.0000 | 17.0           | 14.0                | 12.0           | 23.0             |
|                            |                     |                                                 |                    | 223.3000→192.9500 | 10.0           | 22.0                | 19.0           | 23.0             |
| <i>trans</i> -Ferulic Acid | 19.884              | C <sub>10</sub> H <sub>10</sub> O <sub>4</sub>  | [M-H] <sup>-</sup> | 193.0500→134.0000 | 10.0           | 18.0                | 23.0           | 23.0             |
|                            |                     |                                                 |                    | 193.0500→178.0500 | 10.0           | 15.0                | 15.0           | 23.0             |
| Isorhamnetin               | 21.570              | C <sub>16</sub> H <sub>12</sub> O <sub>7</sub>  | [M+H] <sup>+</sup> | 316.8500→252.8500 | -20.0          | -14.0               | -19.0          | 70.0             |
|                            |                     |                                                 |                    | 316.8500→302.1000 | -20.0          | -25.0               | -13.0          | 70.0             |
| Kaempferol                 | 21.831              | C <sub>15</sub> H <sub>10</sub> O <sub>6</sub>  | [M+H] <sup>+</sup> | 286.8500→222.9500 | -18.0          | -13.0               | -17.0          | 70.0             |
|                            |                     |                                                 |                    | 286.8500→69.1000  | -18.0          | -45.0               | -14.0          | 70.0             |
| Quercetin                  | 20.644              | C <sub>15</sub> H <sub>10</sub> O <sub>7</sub>  | [M+H] <sup>+</sup> | 302.8000→153.0500 | -19.0          | -34.0               | -18.0          | 46.0             |
|                            |                     |                                                 |                    | 302.8000→229.1000 | -14.0          | -30.0               | -18.0          | 46.0             |
| Rhamnetin                  | 22.553              | C <sub>16</sub> H <sub>12</sub> O <sub>7</sub>  | [M-H] <sup>-</sup> | 315.0500→170.7500 | 15.0           | 12.0                | 15.0           | 70.0             |
|                            |                     |                                                 |                    | 315.0500→300.0500 | 22.0           | 22.0                | 19.0           | 70.0             |

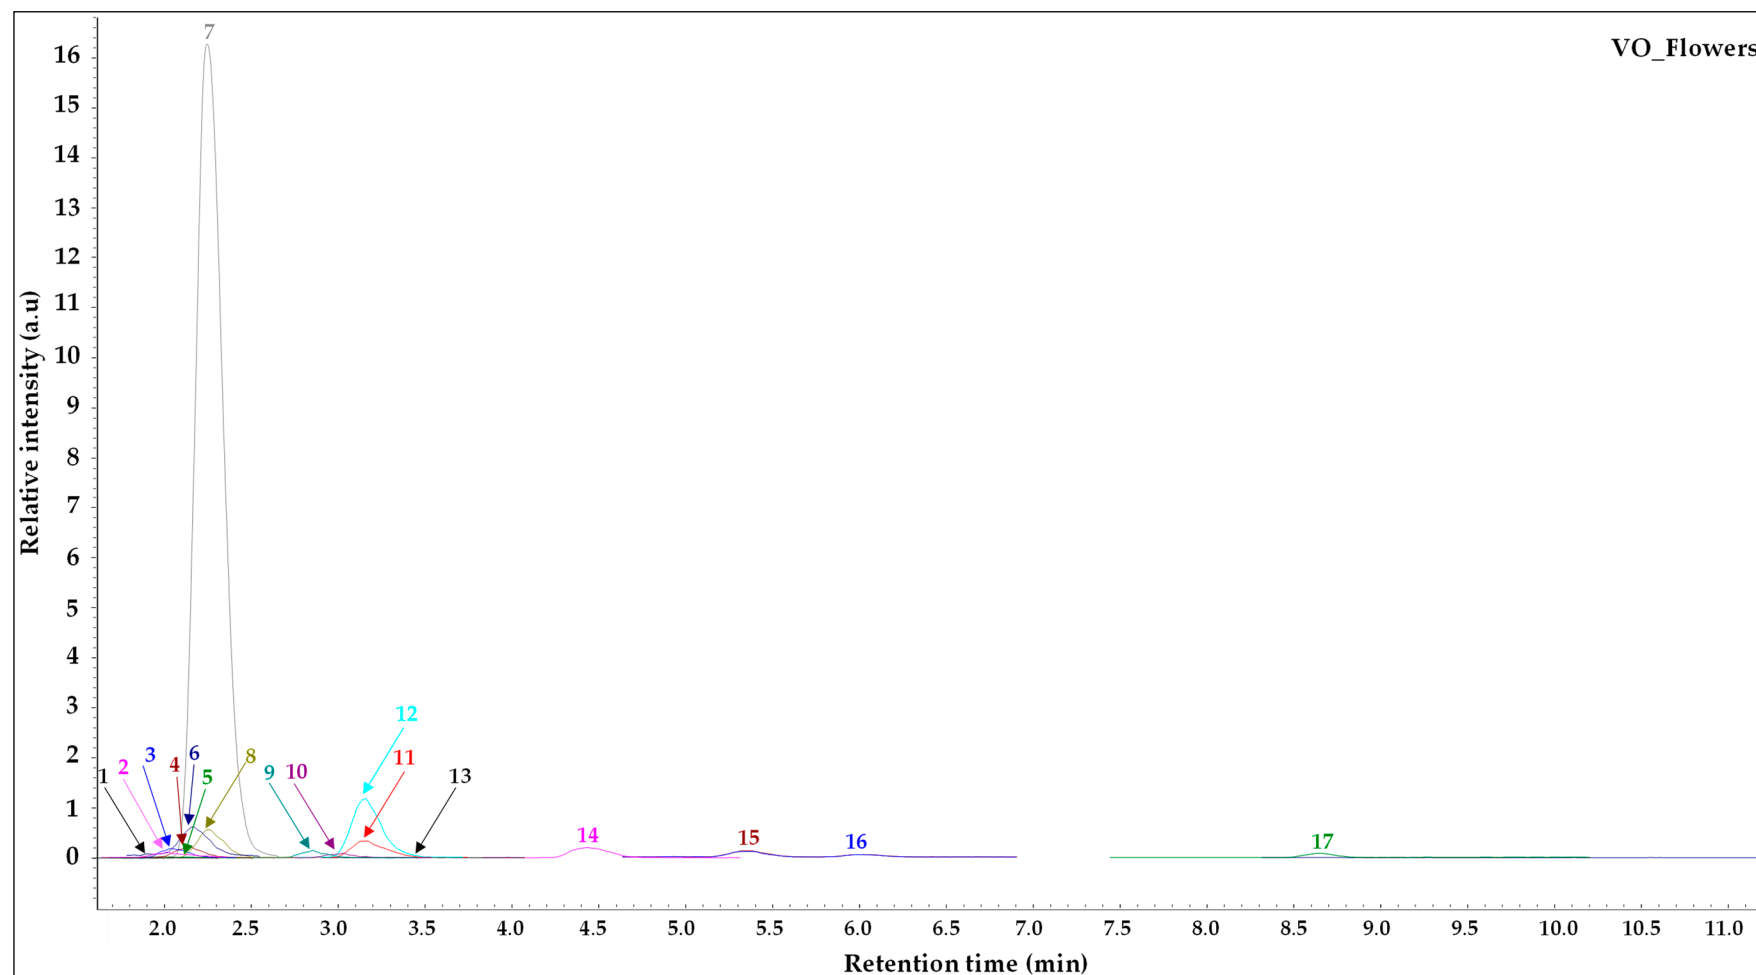

**Figure S1.** Extracted ion chromatogram (EIC) in multiple reaction monitoring (MRM) represents the profile of 17 multiple amino acids identified in the extract derived from flowers of *Viburnum opulus* L. **Note:** 1 – Cystine; 2 – Aspartic acid; 3 – Serine; 4 – Threonine; 5 – Glycine; 6 – Glutamic acid; 7 – Proline; 8 – Alanine; 9 – Histidine; 10 – Lysine; 11 – Valine; 12 – Arginine; 13 – Methionine; 14 – Tyrosine; 15 – Isoleucine; 16 – Leucine; 17 – Phenylalanine.

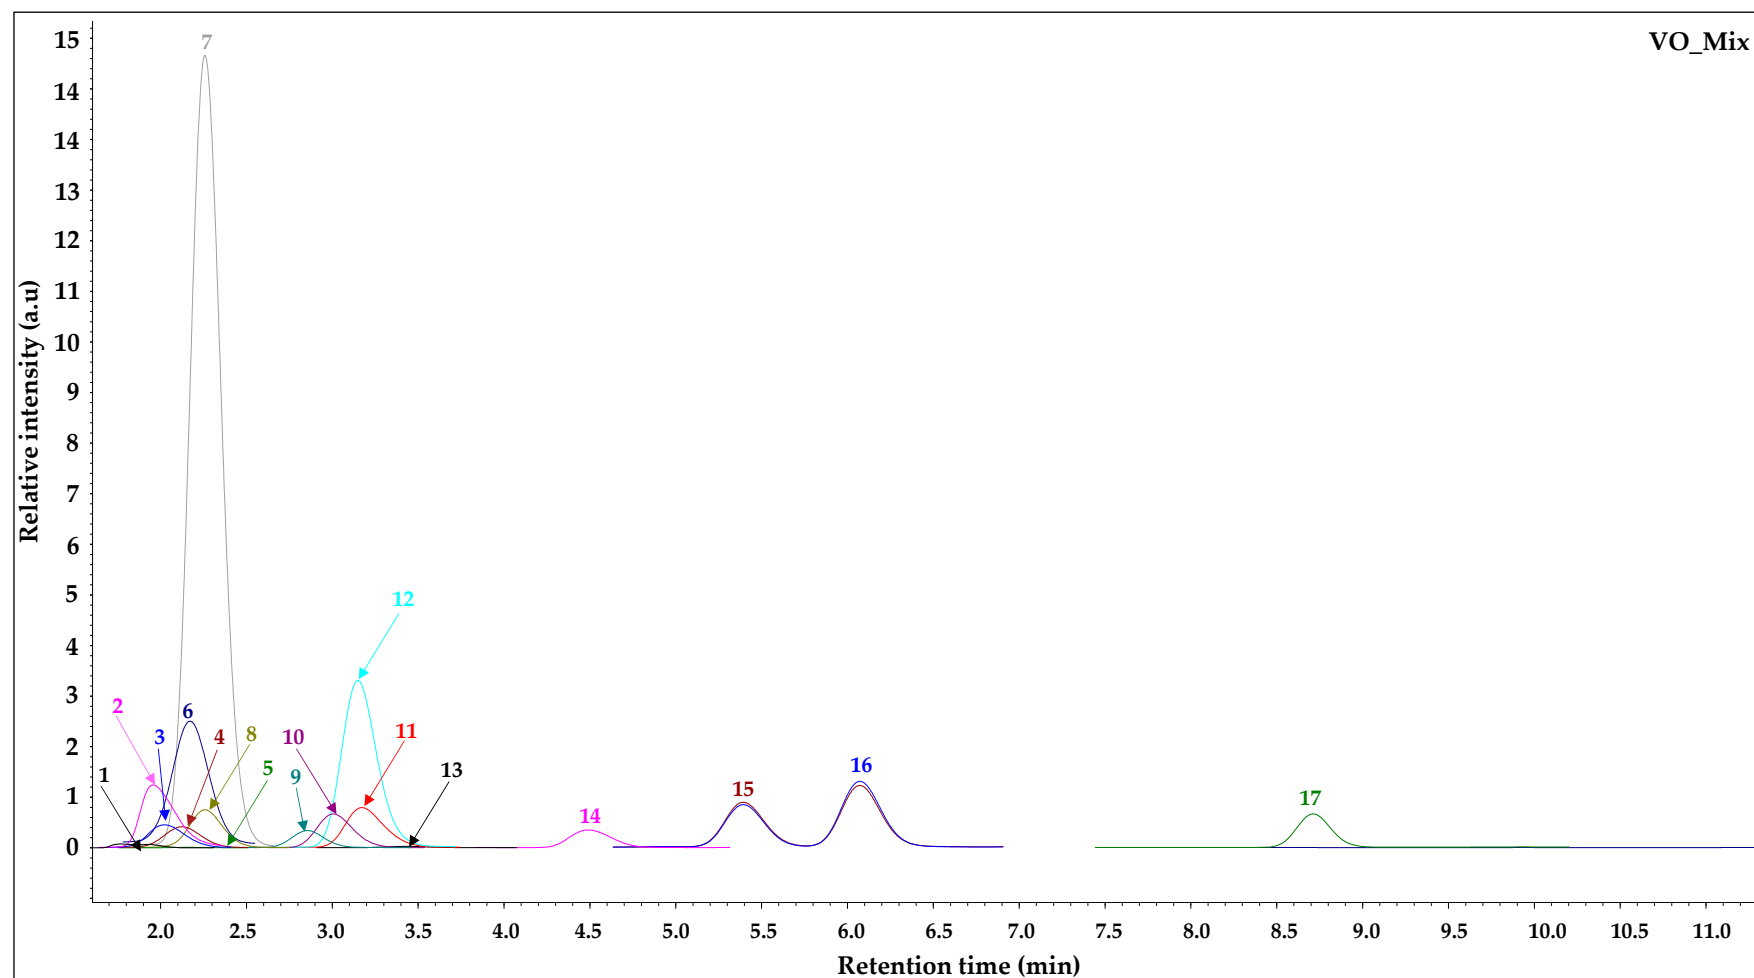

**Figure S2.** Extracted ion chromatogram (EIC) in multiple reaction monitoring (MRM) represents the profile of 17 multiple amino acids identified in the extract derived from mixture of morphological parts (berries without seeds, leaves, buds and bark) of *Viburnum opulus* L. **Note:** 1 – Cystine; 2 – Aspartic acid; 3 – Serine; 4 – Threonine; 5 – Glycine; 6 – Glutamic acid; 7 – Proline; 8 – Alanine; 9 – Histidine; 10 – Lysine; 11 – Valine; 12 – Arginine; 13 – Methionine; 14 – Tyrosine; 15 – Isoleucine; 16 – Leucine; 17 – Phenylalanine.

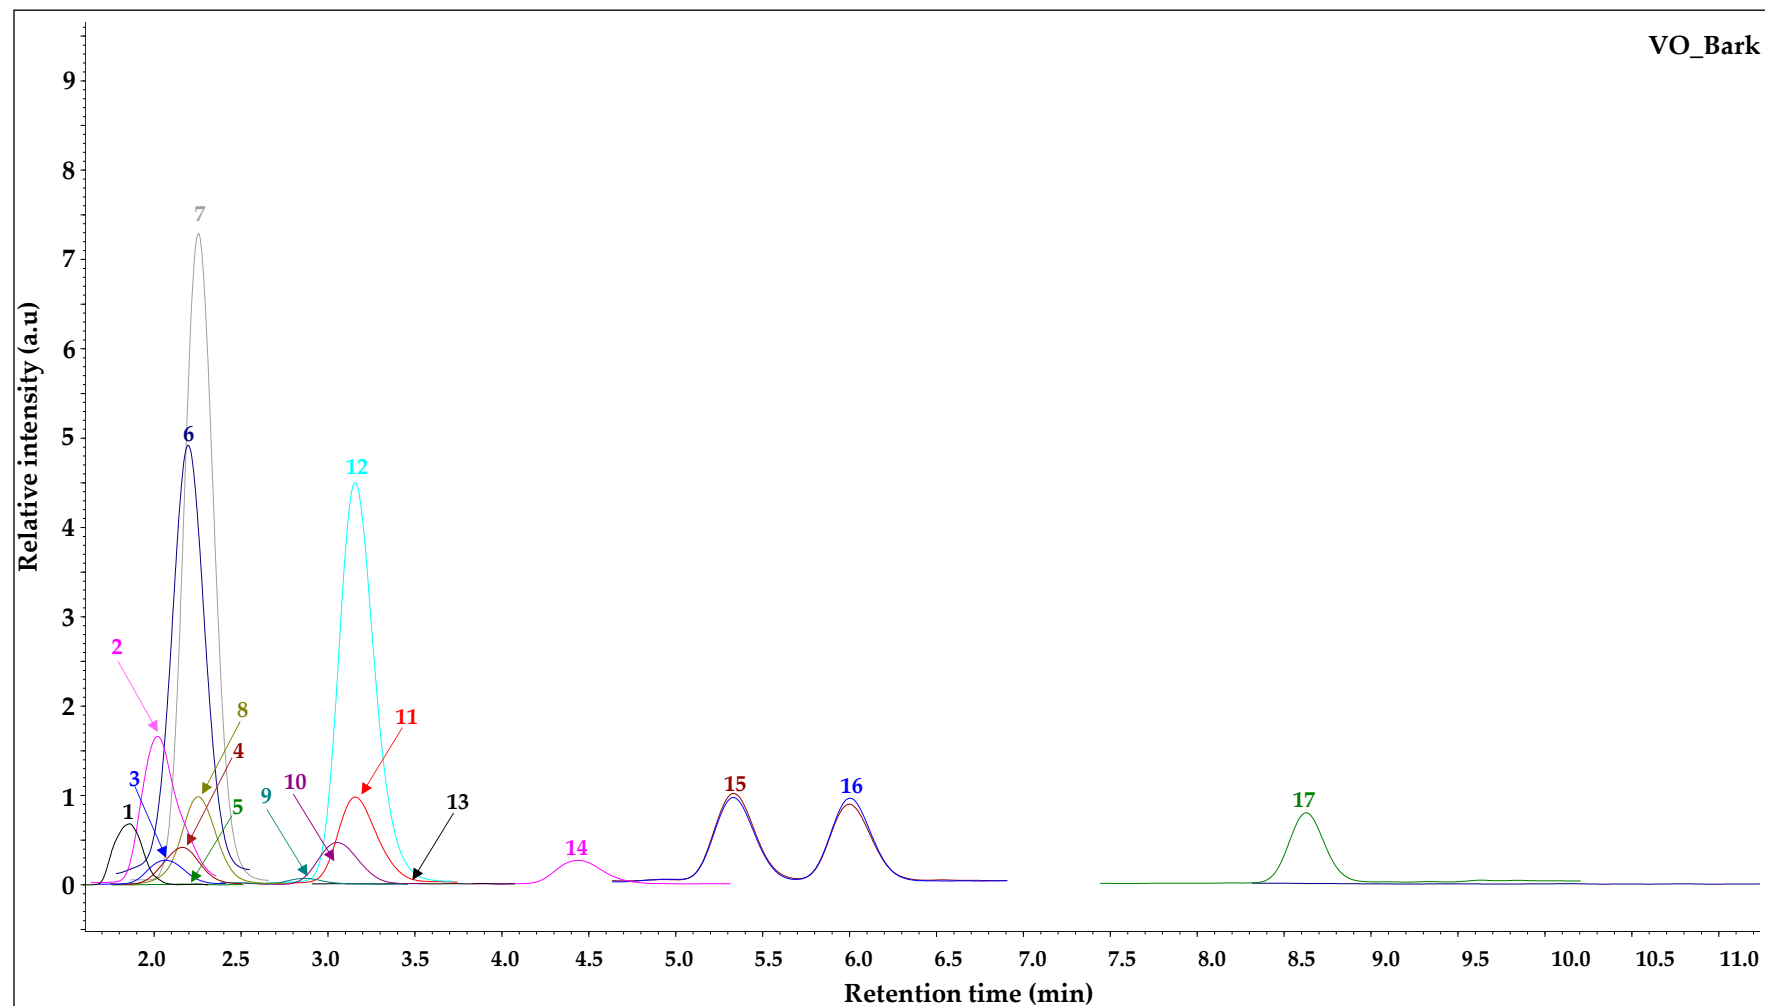

**Figure S3.** Extracted ion chromatogram (EIC) in multiple reaction monitoring (MRM) represents the profile of 17 multiple amino acids identified in the extract derived from bark of *Viburnum opulus* L. **Note:** 1 – Cystine; 2 – Aspartic acid; 3 – Serine; 4 – Threonine; 5 – Glycine; 6 – Glutamic acid; 7 – Proline; 8 – Alanine; 9 – Histidine; 10 – Lysine; 11 – Valine; 12 – Arginine; 13 – Methionine; 14 – Tyrosine; 15 – Isoleucine; 16 – Leucine; 17 – Phenylalanine.



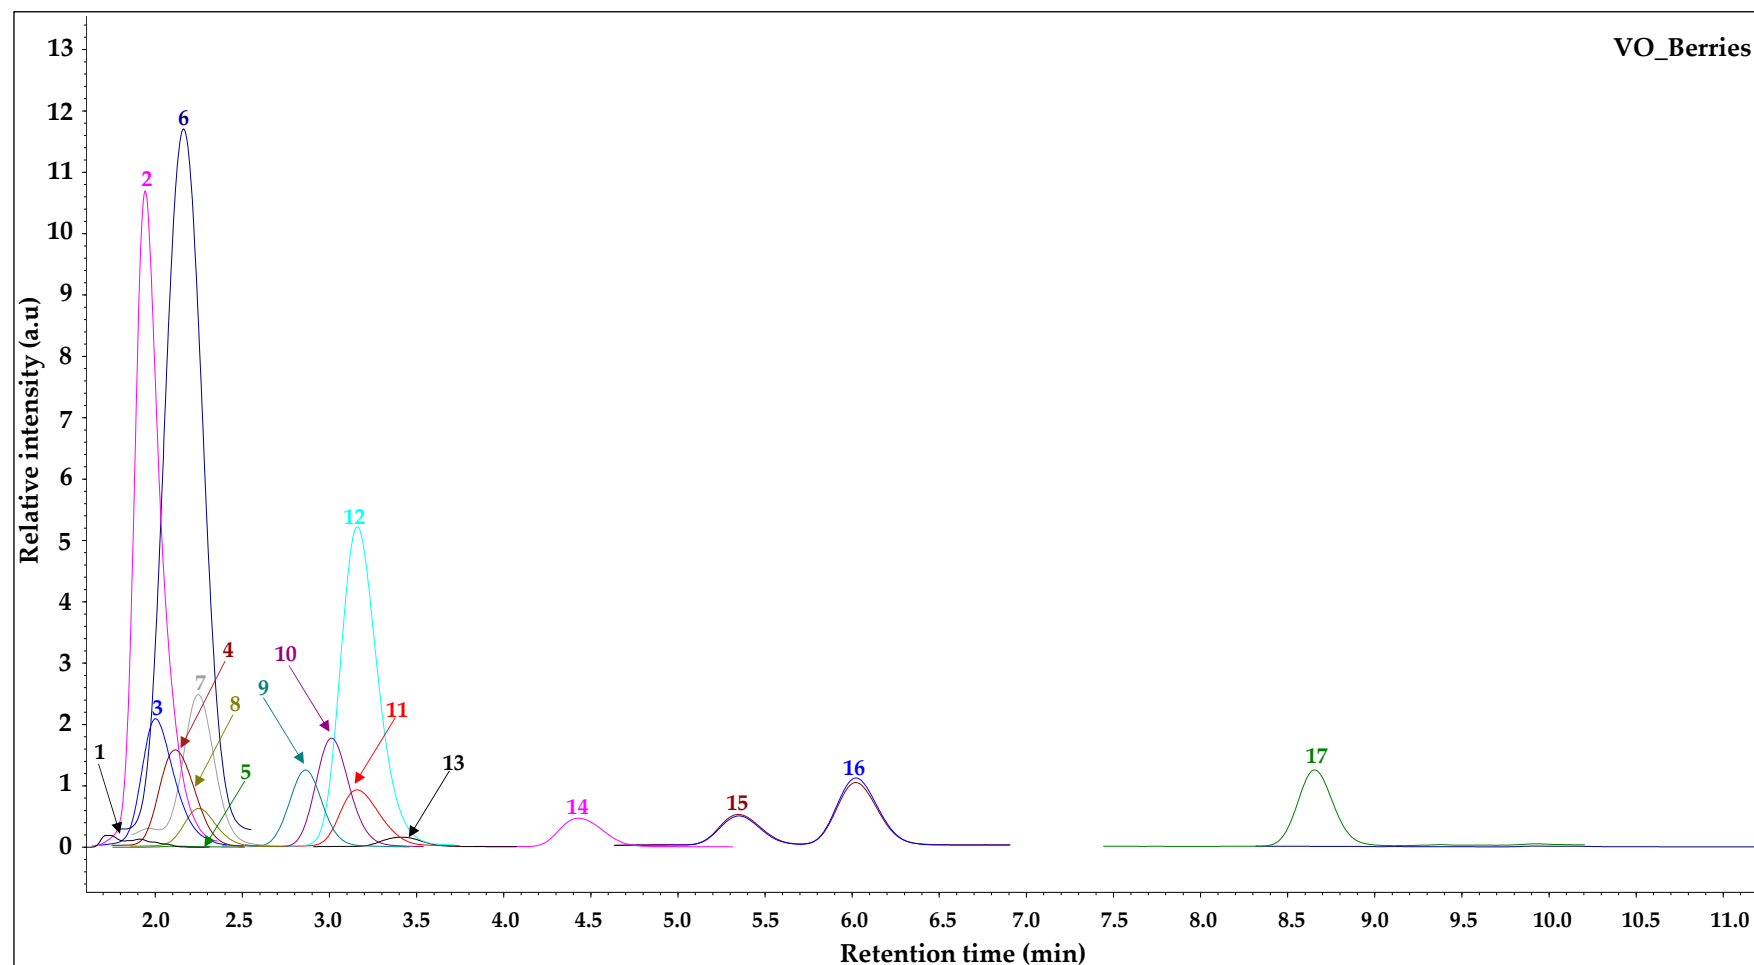

**Figure S4.** Extracted ion chromatogram (EIC) in multiple reaction monitoring (MRM) represents the profile of 17 multiple amino acids identified in the extract derived from berries of *Viburnum opulus* L. **Note:** 1 – Cystine; 2 – Aspartic acid; 3 – Serine; 4 – Threonine; 5 – Glycine; 6 – Glutamic acid; 7 – Proline; 8 – Alanine; 9 – Histidine; 10 – Lysine; 11 – Valine; 12 – Arginine; 13 – Methionine; 14 – Tyrosine; 15 – Isoleucine; 16 – Leucine; 17 – Phenylalanine.

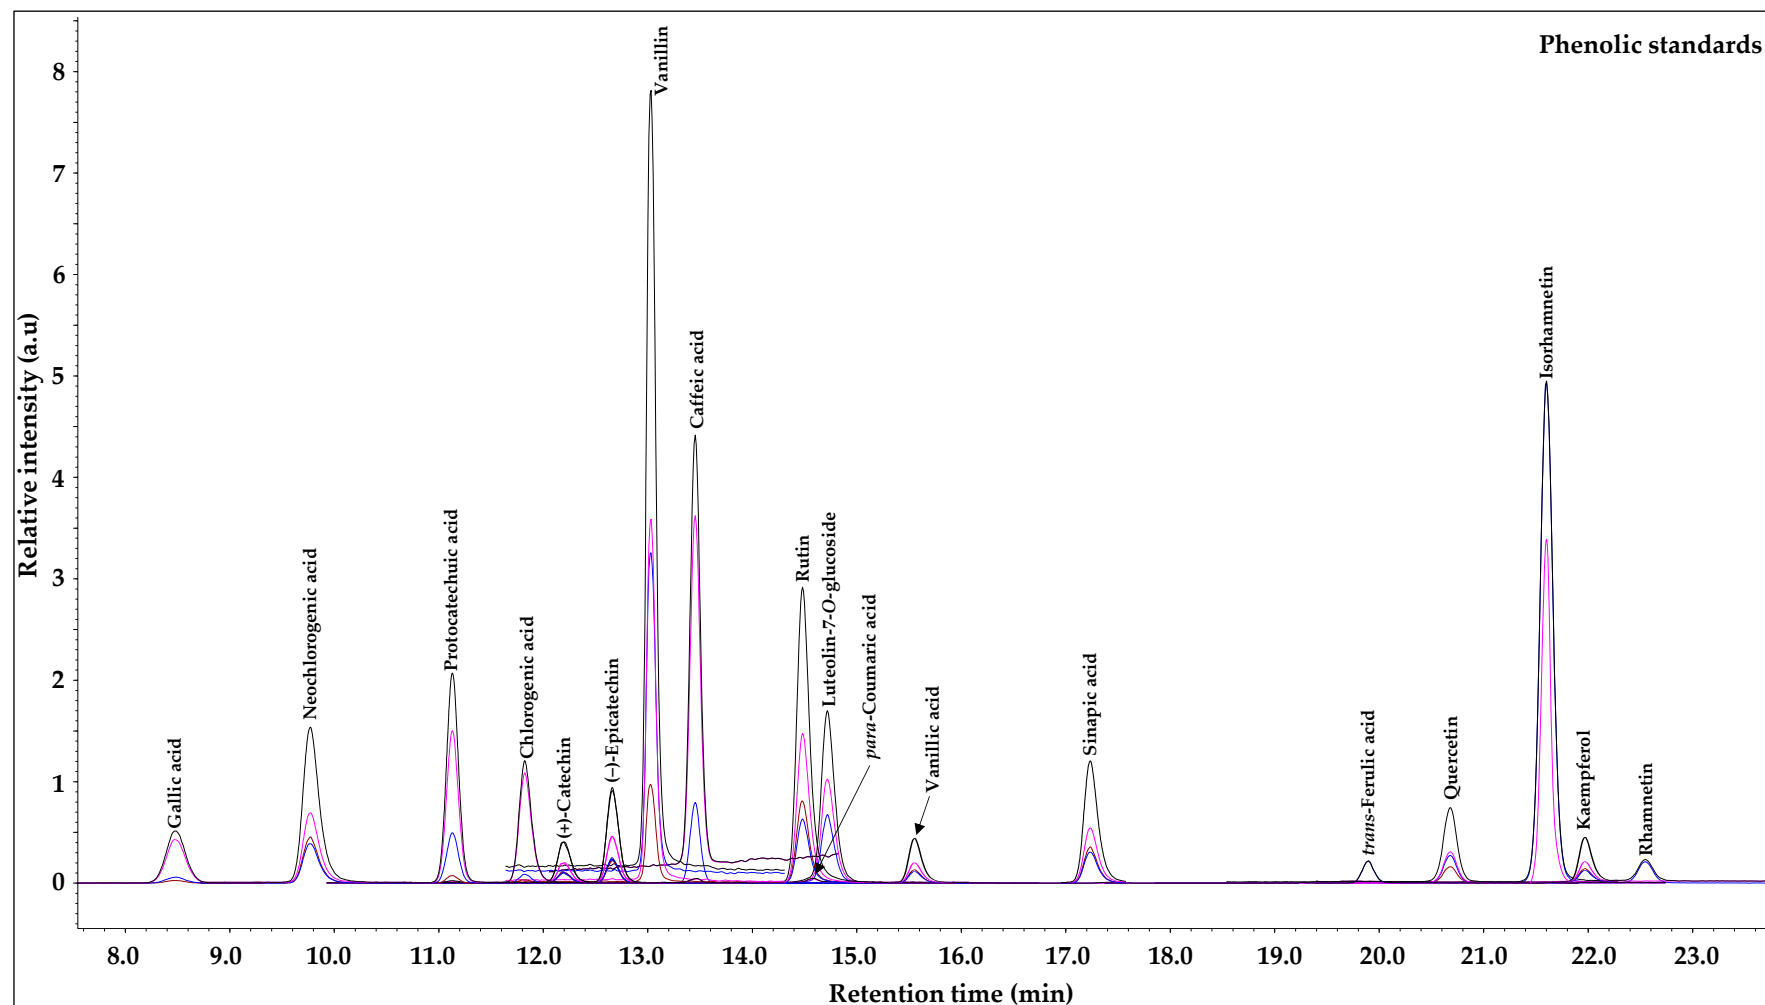

**Figure S5.** Extracted ion chromatogram (EIC) in multiple reaction monitoring (MRM) mode represents the profile of 18 phenolic standards at the concentration of  $1 \mu\text{g mL}^{-1}$ .

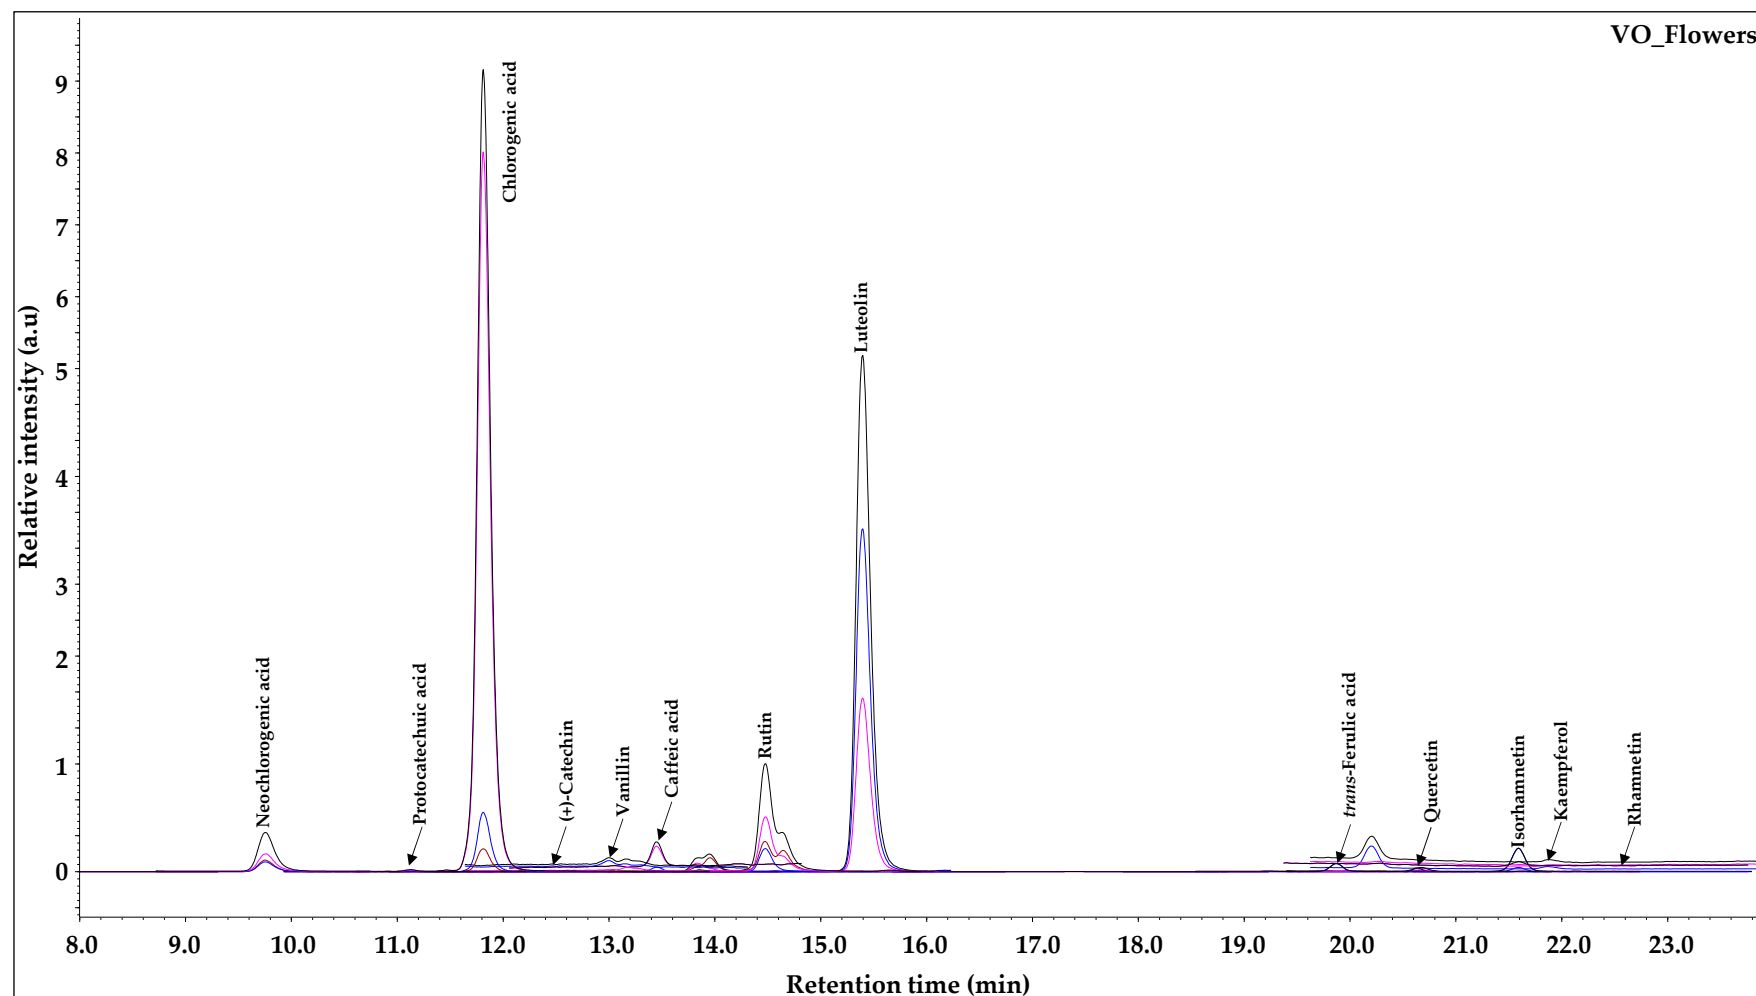

**Figure S6.** Extracted ion chromatogram (EIC) in multiple reaction monitoring (MRM) represents the profile of major phenolic compounds identified in the extract derived from flowers of *Viburnum opulus* L.

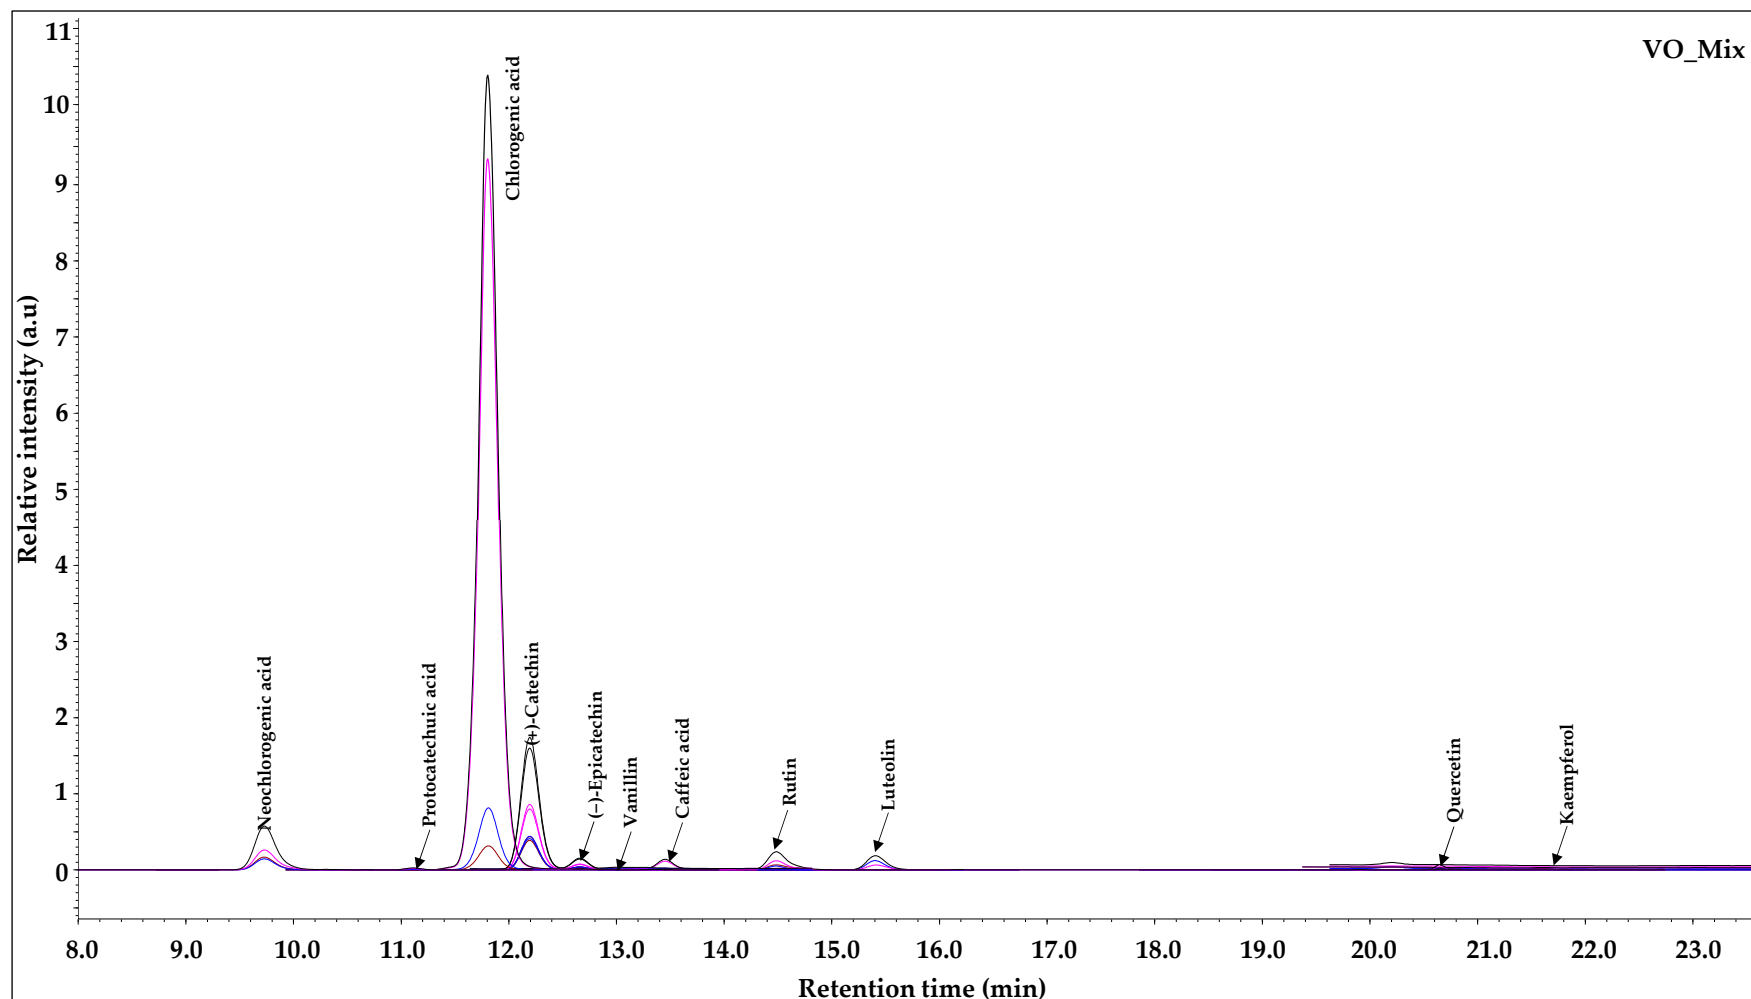

**Figure S7.** Extracted ion chromatogram (EIC) in multiple reaction monitoring (MRM) represents the profile of major phenolic compounds identified in the extract derived from mixture of morphological parts (berries without seeds, leaves, buds and bark) of *Viburnum opulus* L.

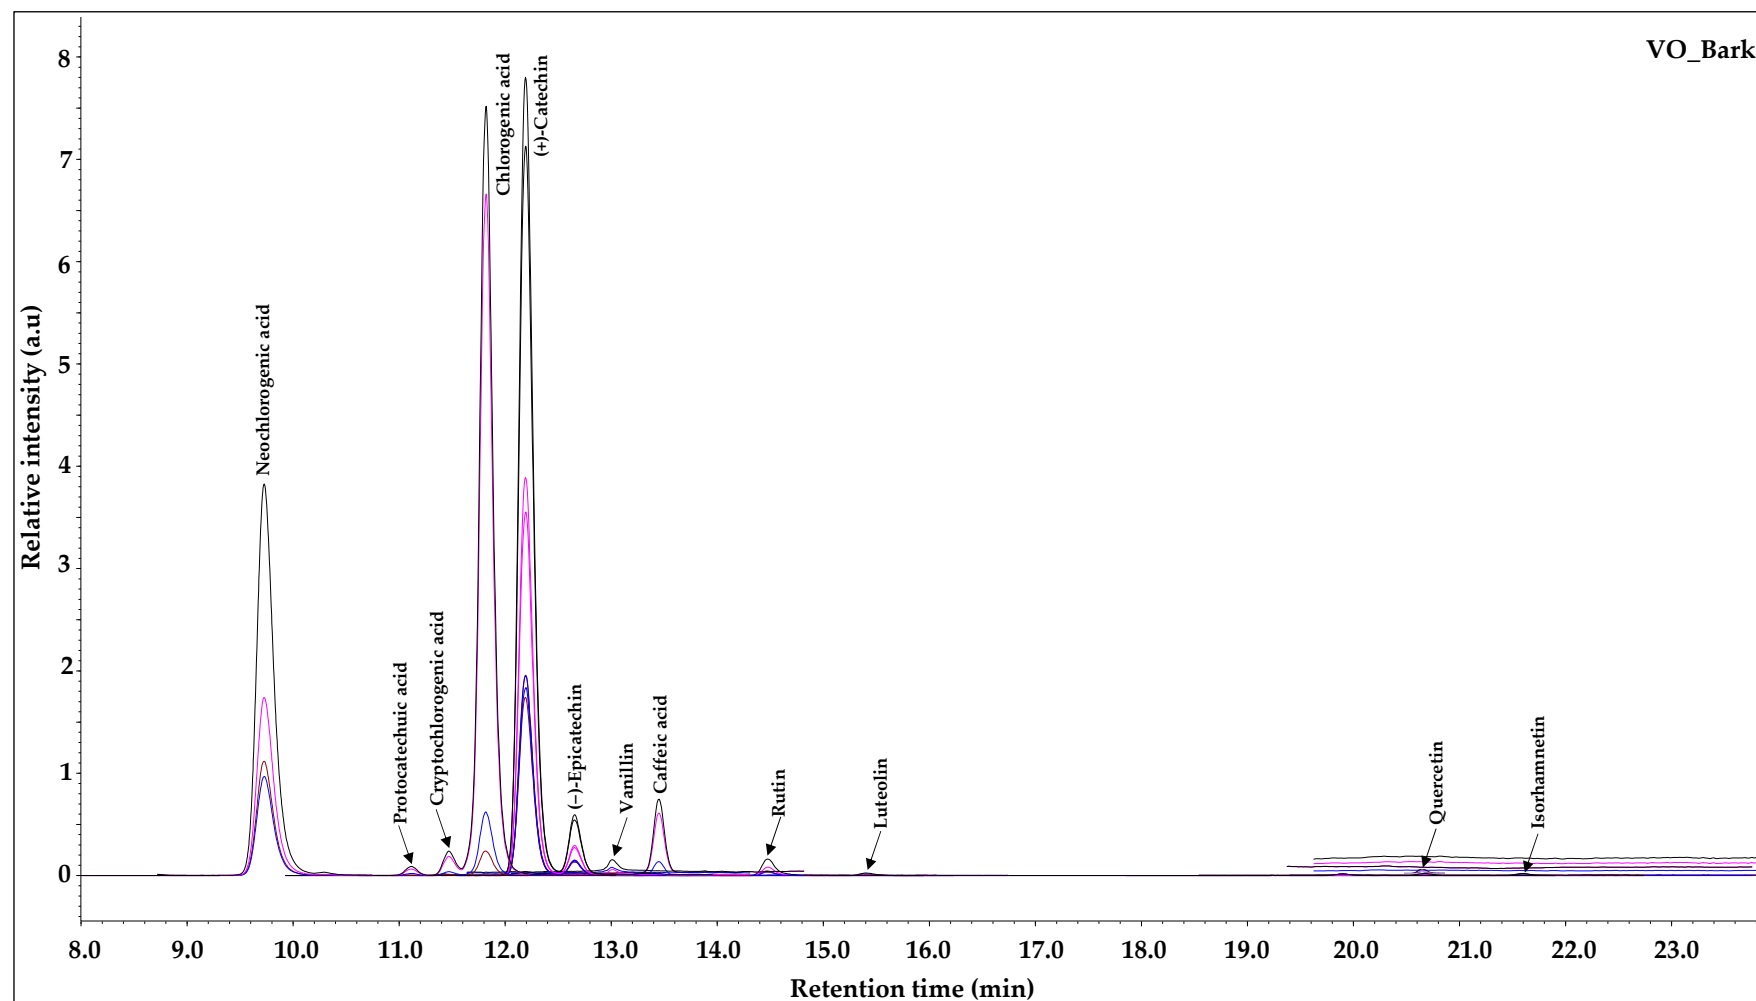

**Figure S8.** Extracted ion chromatogram (EIC) in multiple reaction monitoring (MRM) represents the profile of major phenolic compounds identified in the extracts derived from bark of *Viburnum opulus* L.

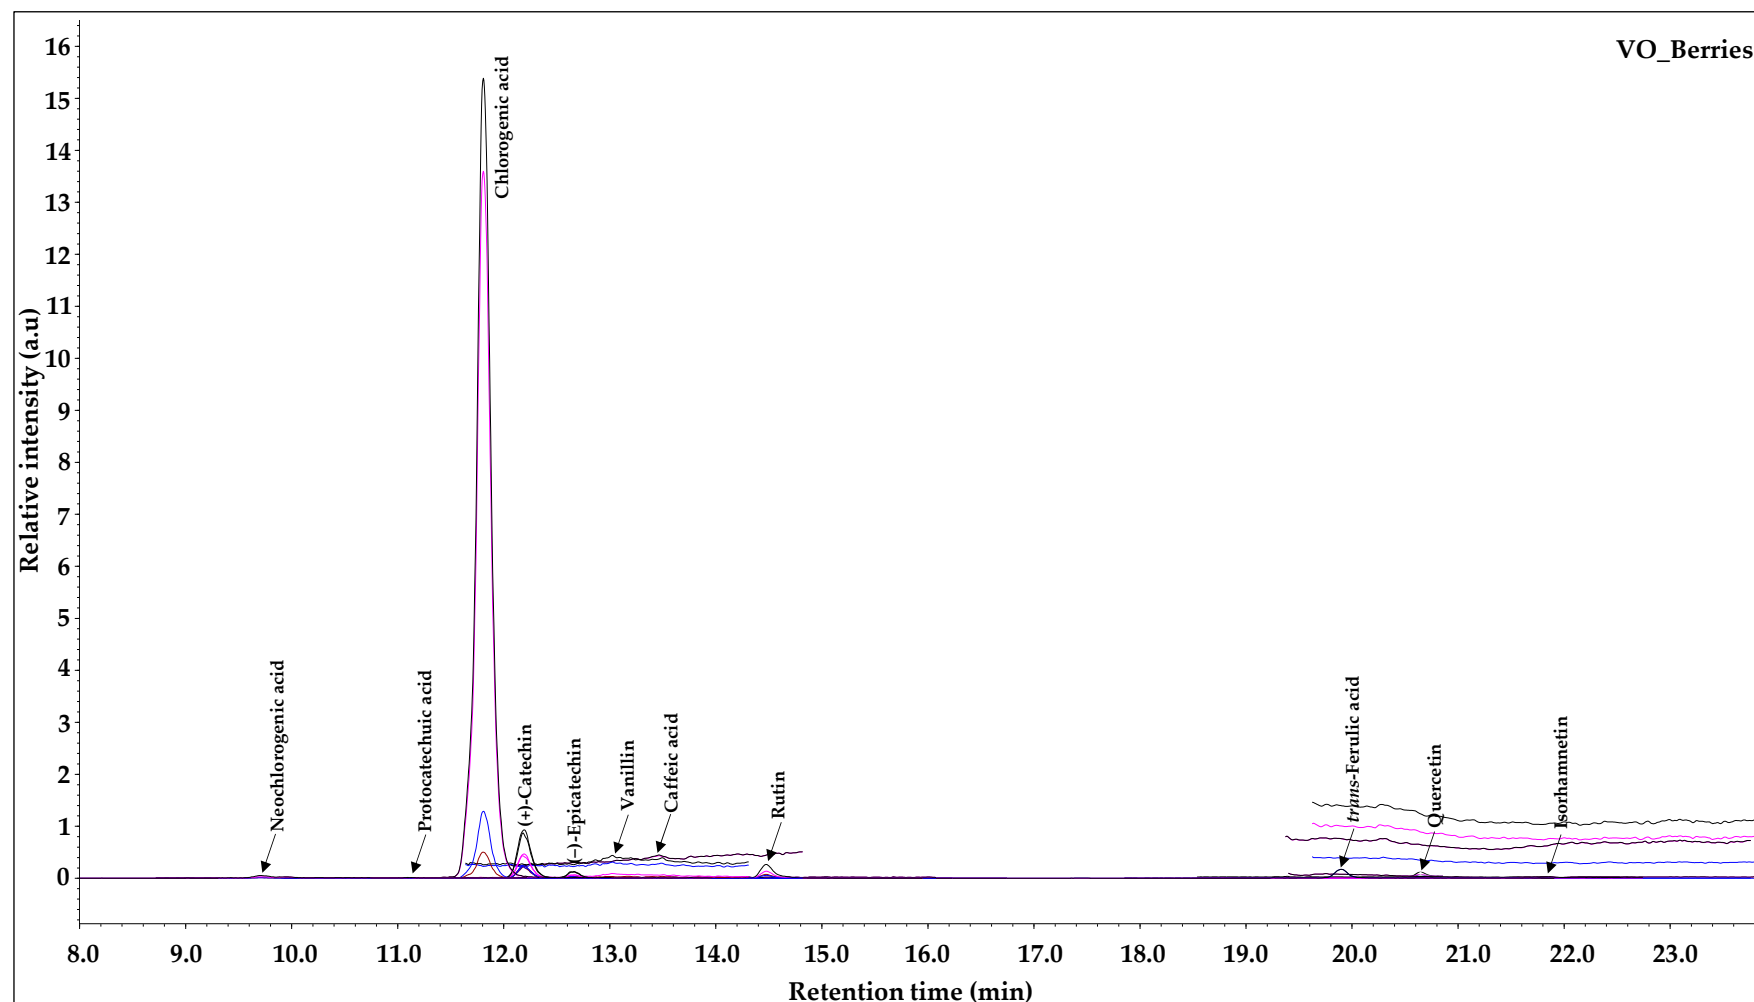

**Figure S9.** Extracted ion chromatogram (EIC) in multiple reaction monitoring (MRM) represents the profile of major phenolic compounds identified in the extracts derived from berries of *Viburnum opulus* L.
